# Supplementary material
Source: PubMed Central journal article supplement (PMC7078070)
Supplement: NIHMS1553285-supplement-1.pdf [file NIHMS1553285-supplement-1.pdf]

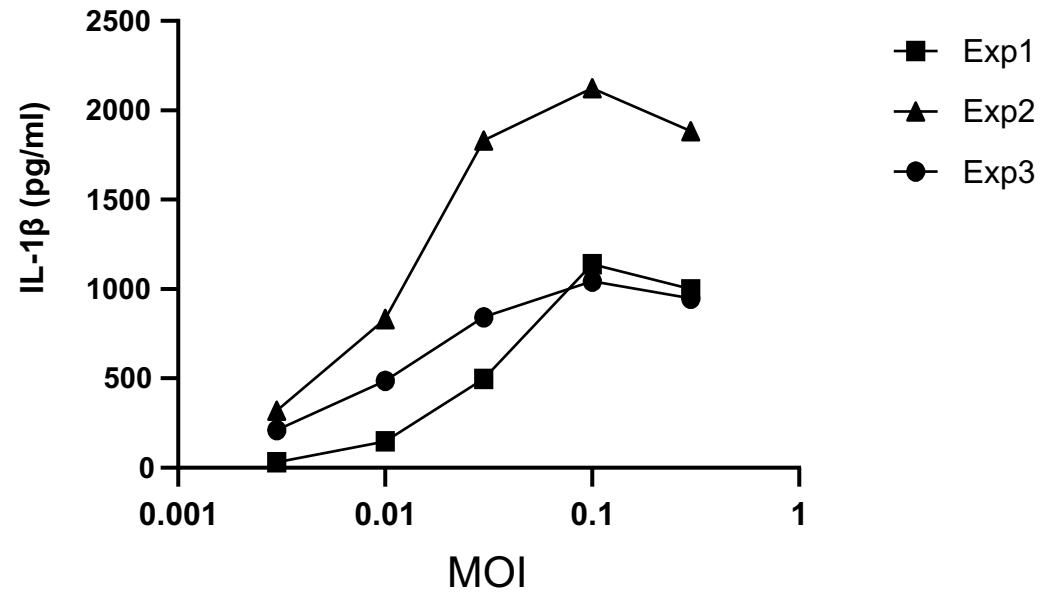

**Supplemental Figure 1. Effect of MHV-68 infection on HBC secretion of IL-1 $\beta$ .**

HBCs were infected with MHV-68 at a an MOI of 0.003 - 0.3 for 1 h. Fresh media was then added, and then incubations were continued for 48 h. Levels of secreted IL-1 $\beta$  were determined by ELISA. Individual data points from three independent experiments are presented.

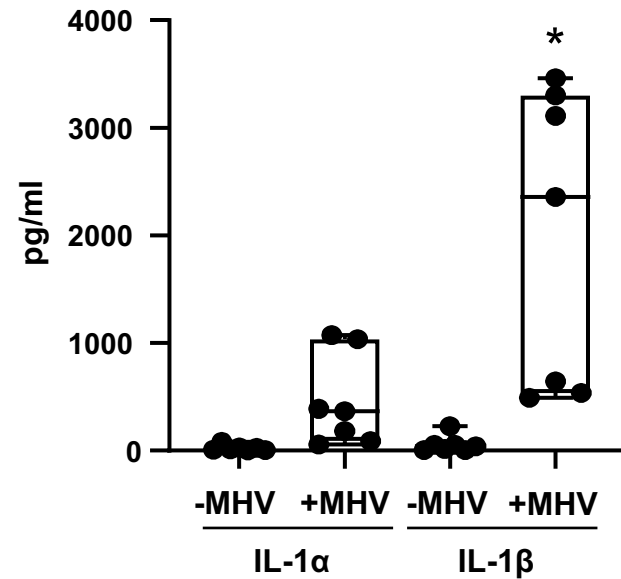

**Supplemental Figure 2. Effect of MHV-68 infection on HBC secretion of IL-1 $\beta$  and IL-1 $\alpha$ .** Media was collected from uninfected HBCs (-) or from HBCs infected with MHV-68 (+) for 1 h, fresh media was then added, and incubations for both groups were continued for 48 h. Levels of secreted IL-1 $\beta$  and IL-1 $\alpha$  were determined by ELISA and are presented as a median and percentiles from seven independent experiments derived from the presented data points. \* $p$  < 0.05 vs IL-1 $\alpha$ .

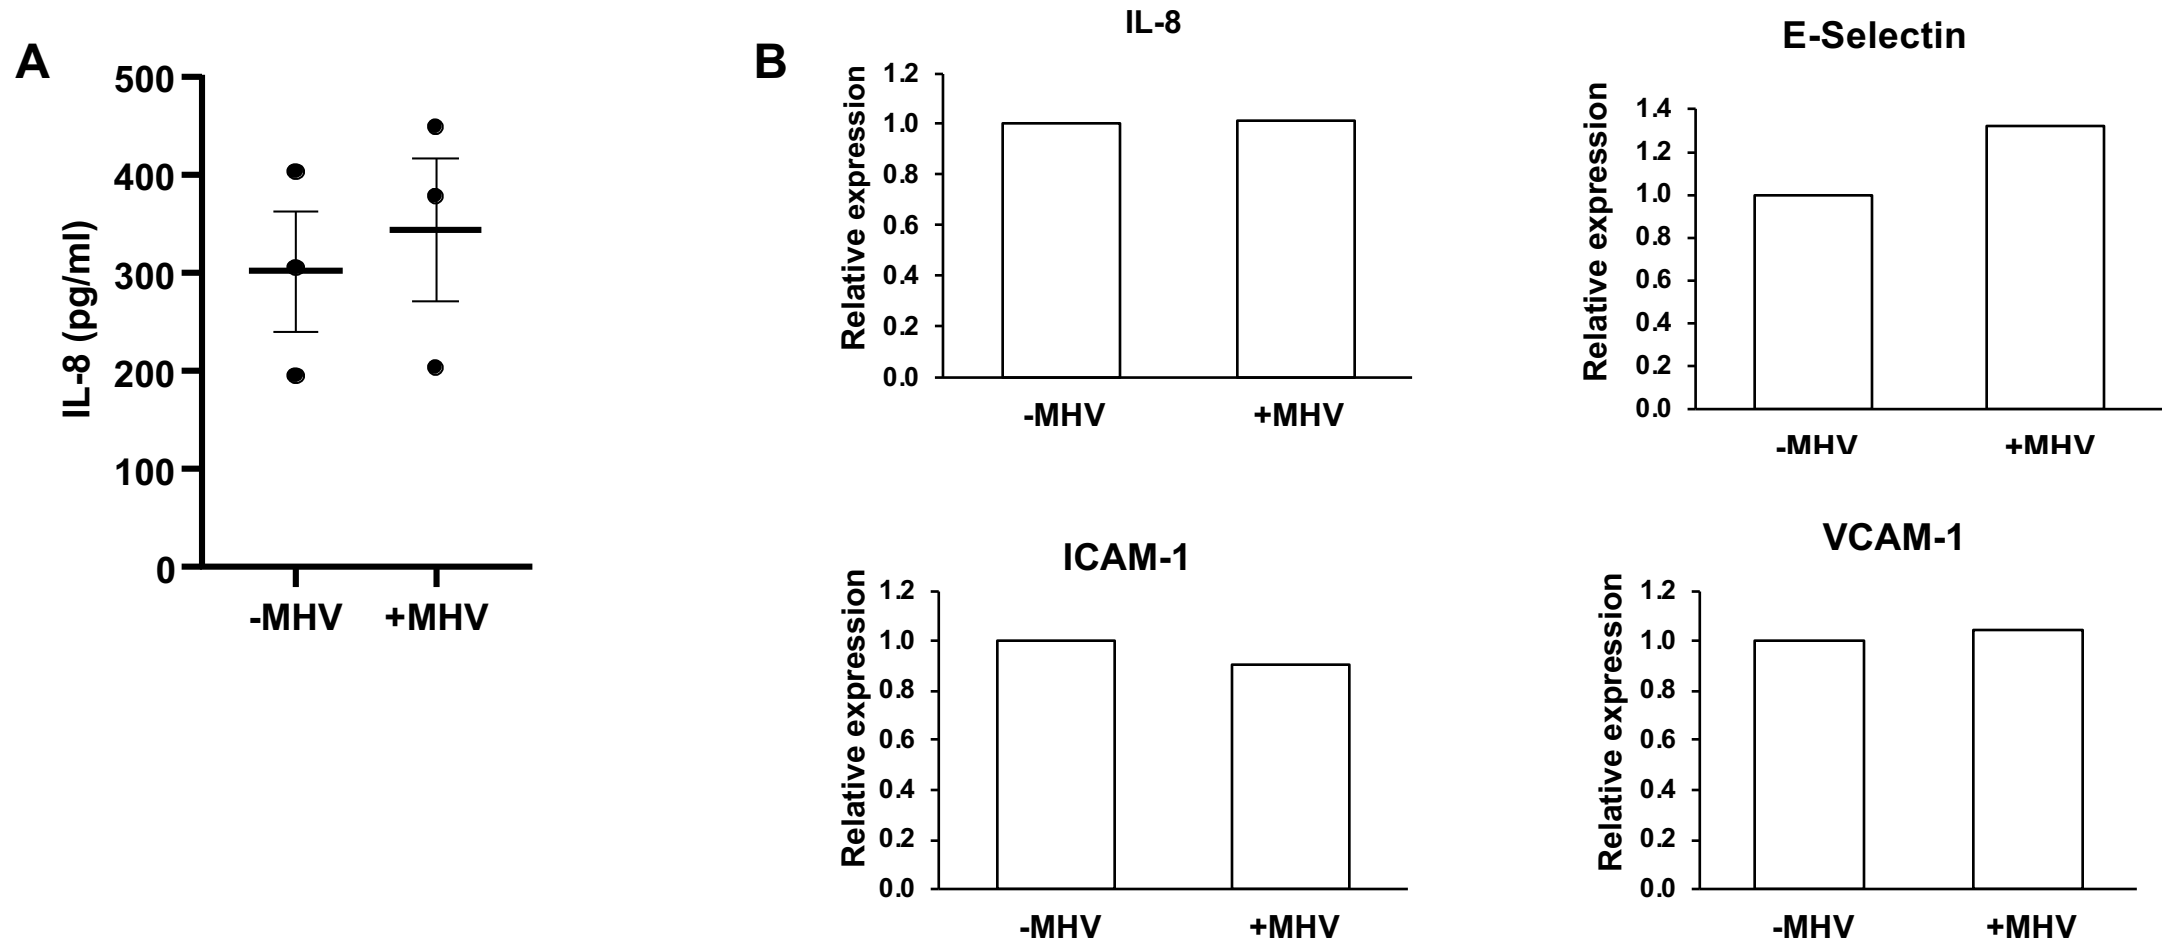

**Supplemental Figure 3. Effect of infection with MHV-68 on levels of secreted IL-8 and IL-8, E-selectin, ICAM-1, and VCAM-1 mRNAs in HUVECs.** HUVECs were not infected (-MHV) or infected (+MHV) with MHV-68 for 1 h, fresh media was added, and cells were incubated for an additional 48 h and levels of secreted IL-8 were determined by ELISA (A). Levels of IL-8 secretion by HUVECs was not significantly increased by infection. Alternatively, 24 h after infection, levels of IL-8, E-selectin, ICAM-1, and VCAM-1 mRNA were analyzed by qPCR and normalized to 18S RNA levels. Results from three independent experiments presented as individual data points and as a mean  $\pm$  SE (A) and a single experiment (B) are shown.

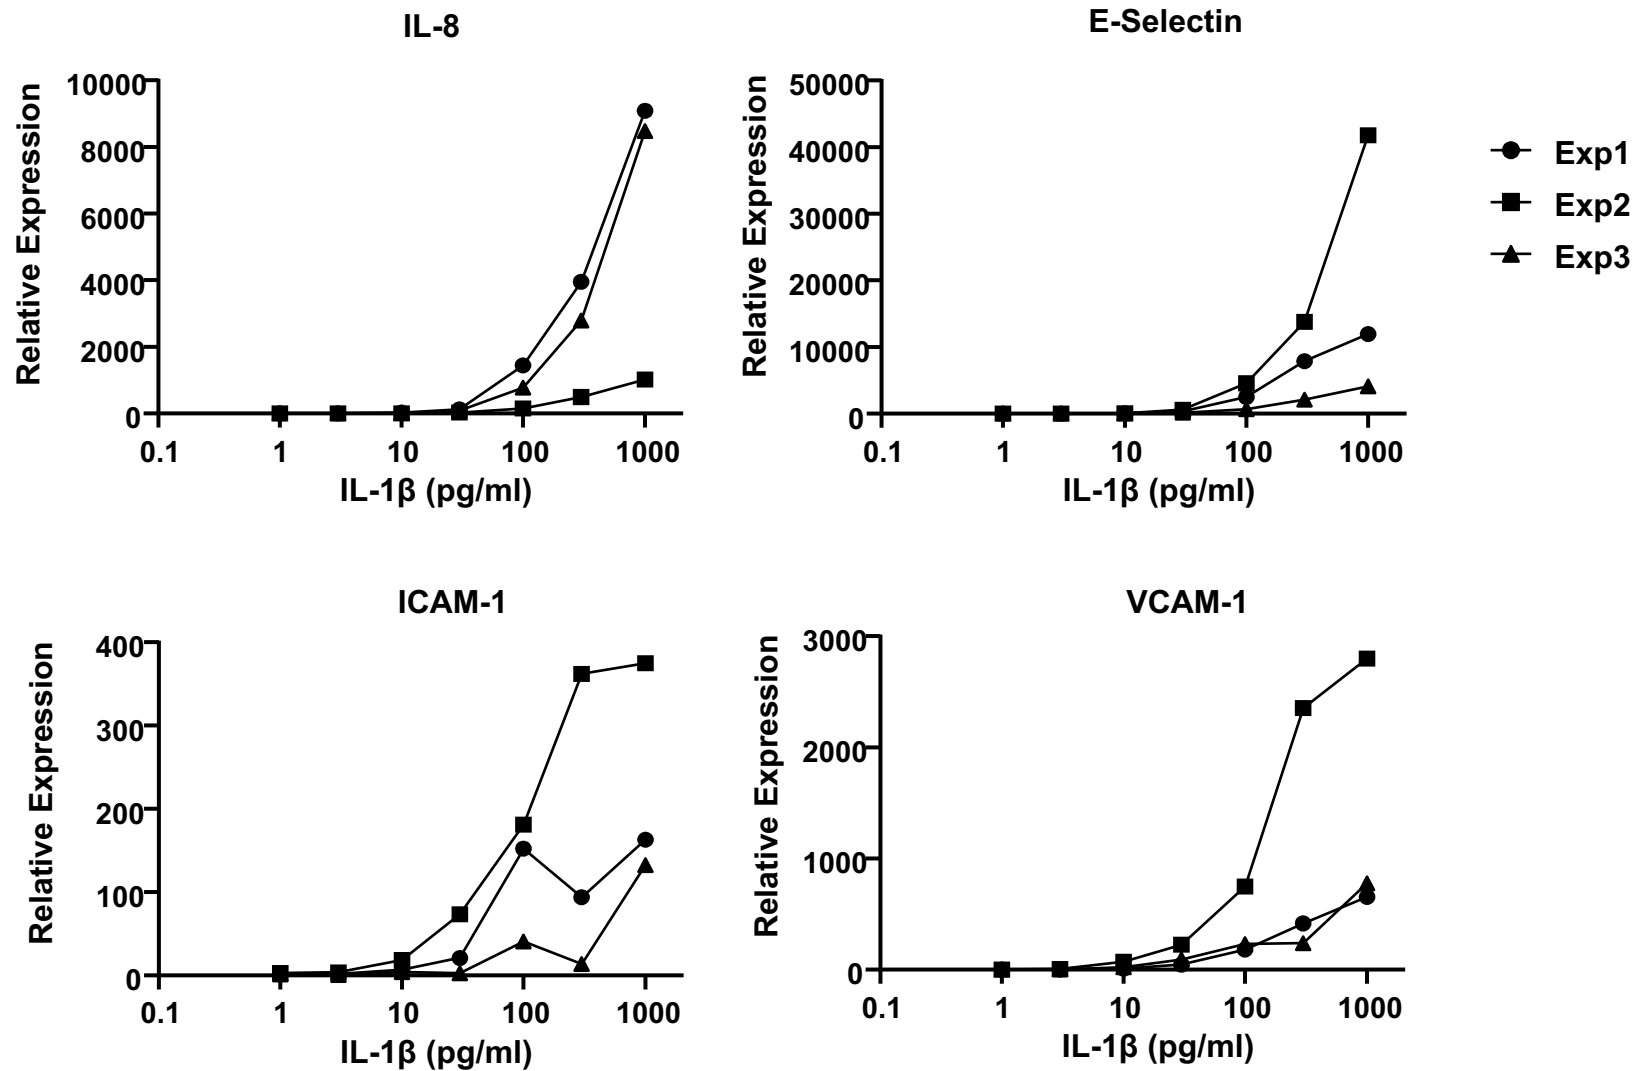

**Supplemental Figure 4. Effect of exogenous IL-1β on pro-neutrophilic mRNA expression in HUVECs.**

HUVECs were incubated with increasing concentrations (0-1000 pg/ml) of exogenous recombinant IL-1β for 24 h. Levels of IL-8, E-selectin, ICAM-1, and VCAM-1 mRNA were analyzed by qPCR and normalized to 18S RNA levels.

Results are shown from three independent experiments presented as individual data points.
